# Supplementary material for: Immunomodulatory effects of mixed Lactobacillus plantarum on lipopolysaccharide-induced intestinal injury in mice
Source: Royal Society of Chemistry journal article supplement (doi:10.1039/d1fo04204a), 2022-01-01
Supplement: d1fo04204a1.pdf [file d1fo04204a1.pdf]

## Supplementary materials

**Table.1** DAI score rules

| Body weight loss (%) | Stool type        | Blood in feces                          | Score |
|----------------------|-------------------|-----------------------------------------|-------|
| < 2%                 | Normal            | Negative (no bleeding)                  | 0     |
| ≥2-5%<               | Softer stool      | Weak positive (weak hemocult)           | 1     |
| ≥5-10%<              | Moderate diarrhea | Positive (visual blood in feces)        | 2     |
| ≥10-15%<             | Diarrhea          | Strong positive (fresh rectal bleeding) | 3     |
| ≥15%                 | -                 |                                         | 4     |

**Table.2** Histological score

| Parameters                                     | Score | Histological features  |
|------------------------------------------------|-------|------------------------|
| Surface epithelial loss                        | 0     | No change              |
| Crypt destruction                              | 1     | Localized and mild     |
|                                                | 2     | Localized and moderate |
|                                                | 3     | Extensive and moderate |
| Inflammatory cell infiltration into the mucosa | 4     | Extensive and severe   |

**Table.3** Chiu's score

| Grade | Characteristics                                                                                                                  |
|-------|----------------------------------------------------------------------------------------------------------------------------------|
| 0     | Mucosa with normal villi                                                                                                         |
| 1     | Development of the subepithelial Gruenhagen's space, usually at the villus apex, frequently associated with capillary congestion |
| 2     | Extension of the subepithelial space with moderate lifting of epithelial layer from the lamina propria                           |
| 3     | Massive epithelial lifting down the sides of the villi                                                                           |
| 4     | Denuded villi with lamina propria and dilated capillaries exposed.<br>Increased cellularity of lamina propria may be noted       |
| 5     | Digestion and disintegration of lamina propria; hemorrhage and ulceration.                                                       |

**Table.4** The sequences information of primers

| Gene                    | Primer sequence (5'→3')                                      |
|-------------------------|--------------------------------------------------------------|
| NF-κB signaling pathway |                                                              |
| TLR4                    | F: GAGCCGGAAGGTTATTGTGGTAGTG<br>R: AGGACAATGAAGATGATGCCAGAGC |
| IκB                     | F: TGGTGTGACTGTGGATCTCTGGAG<br>R: GGCTGGCTTCTCTGTGGTGATTC    |
| NF-κB                   | F: GCAAGCGTATCCCAAGAAGAGGTG<br>R: GCGATGCCTGCTACCACTCATTAC   |
| Tight junction proteins |                                                              |
| ZO-1                    | F: AACCCGAAACTGATGCTGTGGATAG<br>R: CGCCCTTGGAATGTATGTGGAGAG  |
| Claudin1                | F: GCTGGGTTTCATCCTGGCTTCTC<br>R: CCTGAGCGGTCACGATGTTGTC      |
| Occludin                | F: TTGGCTACGGAGGTGGCTATGG<br>R: CCTTTGGCTGCTCTTGGGTCTG       |
| MUC2                    | F: CGAGCACATCACCTACCACATCATC<br>R: TCCAGAATCCAGCCAGCCAGTC    |
| Housekeeping gene       |                                                              |
| β-actin                 | F: GGTTGTCTCCTGCGACTTCA<br>R: TGGTCCAGGGTTTCTTACTCC          |
